# Supplementary material for: Theoretical investigation on degradation of CHCCH2OH by NO3 radicals in the atmosphere
Source: Royal Society of Chemistry journal article supplement (doi:10.1039/d4ra03922j), 2024-01-01
Supplement: d4ra03922j1.pdf [file d4ra03922j1.pdf]

Supplementary Material for

## Theoretical investigation on degradation of $\text{CH}\equiv\text{CCH}_2\text{OH}$ by $\text{NO}_3$ radicals in the atmosphere

Jikang Gao<sup>1</sup>, Meilian Zhao<sup>2</sup>, Yaru Wang,<sup>1</sup> Junchao Liao,<sup>1</sup> Yunju Zhang<sup>1\*</sup>

<sup>1</sup>Key Laboratory of Photoinduced Functional Materials, Mianyang Normal University,  
Mianyang 621000, PR China

<sup>2</sup>College of Medical Technology, Chengdu University of Traditional Chinese Medicine  
Liutai Avenue, Wenjiang District ChengDu PR China

Computational details of rate constants.

For SCHEME 1:

$$k_{\text{TS1-ir-r}}(T, P) = \frac{\alpha_a}{h} \frac{Q_t^\ddagger Q_r^\ddagger}{Q_{\text{CH}\equiv\text{CCH}_2\text{OH}} Q_{\text{NO}_3}} e^{-E_a/RT} \times \int_0^\infty \frac{\omega}{X_2} N_a(E^\ddagger) e^{-E^\ddagger/RT} dE^\ddagger \quad (1)$$

$$k_{\text{TS1-IR-R-TS2-IR-R}}(T, P) = \frac{\alpha_a}{h} \frac{Q_t^\ddagger Q_r^\ddagger}{Q_{\text{CH}\equiv\text{CCH}_2\text{OH}} Q_{\text{NO}_3}} e^{-E_a/RT} \times \int_0^\infty \frac{\omega X_1}{X_2} N_a(E^\ddagger) e^{-E^\ddagger/RT} dE^\ddagger \quad (2)$$

$$k_{\text{P1}(\text{CH}_2\text{CONO}_2\text{CHO+H})}(T, P) = \frac{\alpha_a}{h} \frac{Q_t^\ddagger Q_r^\ddagger}{Q_{\text{CH}_2=\text{CH}=\text{CH}_2} Q_{\text{NO}_3}} e^{-E_a/RT} \times \int_0^\infty \frac{k_4(E) X_1}{X_2} N_a(E^\ddagger) e^{-E^\ddagger/RT} dE^\ddagger \quad (3)$$

Where

$$X_1 = k_2(E)/(k_3(E) + k_4(E) + \omega)$$

$$X_2 = k_1(E) + k_2(E) - k_3(E) * X_1 + \omega$$

<sup>1\*</sup> Corresponding author. Email address: [zhangyj010@nenu.edu.cn](mailto:zhangyj010@nenu.edu.cn) Tel.: +86 816 2200064; Fax: +86 816 2200819

For SCHEME 2:

$$k_{\text{TS2-IF-F}}(T, P) = \frac{\alpha_a}{h} \frac{Q_t^\ddagger Q_r^\ddagger}{Q_{\text{CH}\equiv\text{CCH}_2\text{OH}} Q_{\text{NO}_3}} e^{-E_a/RT} \times \int_0^\infty \frac{\omega}{k_1(E) + k_2(E) + \omega} N_a(E^\ddagger) e^{-E^\ddagger/RT} dE^\ddagger \quad (4)$$

$$k_{\text{P(CHOCCH}_2\text{OH}+\text{NO}_2)}(T, P) = \frac{\alpha_a}{h} \frac{Q_t^\ddagger Q_r^\ddagger}{Q_{\text{CH}=\text{CHCH}_2\text{OH}} Q_{\text{NO}_3}} e^{-E_a/RT} \times \int_0^\infty \frac{k_2(E)}{k_1(E) + k_2(E) + \omega} N_a(E^\ddagger) e^{-E^\ddagger/RT} dE^\ddagger \quad (5)$$

The microcanonical rate constant is calculated using the RRKM theory as follows:

$$k_i(E) = \alpha_i C_i N_i(E_i^\ddagger) / h \rho_j(E_j) \quad (6)$$

In the above equations,  $\alpha_a$  is the statistical factor for the reaction path a, and  $\alpha_i$  is the statistical factor (degeneracy) for the  $i$ th reaction path;  $E_a$  is the energy barrier for the reaction step a.  $Q_{\text{NO}_3}$  and  $Q_{\text{CH}=\text{CHCH}_2\text{OH}}$  are the total partition function of  $\text{NO}_3$  and  $\text{CH}=\text{CCH}_2\text{OH}$ , respectively;  $Q_t^\ddagger$  and  $Q_r^\ddagger$  are the translational and rotational partition functions of entrance transition state, respectively;  $N_a(E^\ddagger)$  is the number of state for the association transition state with excess energy  $E^\ddagger$  above the association barrier.  $k_i(E)$  is the energy-specific rate constant for the  $i$ th channel and  $C_i$  is the ratio of the overall rotational partition function of the  $\text{TS}_i$  and  $\text{IM}_j$ ;  $N_i(E_i^\ddagger)$  is the number of states at the energy above the barrier height for transition state  $i$ ;  $\rho_j(E_j)$  is the density of states at energy  $E_j$  of the intermediate. The density of states and the number of states are calculated using the extended Beyer-Swinehart algorithm.

The rate coefficients for the direct hydrogen abstraction routes can be readily obtained using the conventional transition-state theory [1]:

$$k_{abs}(T) = \kappa_1 \frac{k_B T}{h} \frac{Q_{TS}^\ddagger}{Q_{CH\equiv CCH_2OH} Q_{NO_3}} e^{-E_I/(RT)} \quad (7)$$

where  $\kappa_1$  is the tunneling factor,  $k_B$  and  $h$  are Boltzmann and Planck constants, respectively.  $Q_{TS}^\ddagger$ ,  $Q_{CH\equiv CCH_2OH}$  and  $Q_{NO_3}$  are the h-TS1 and h-TS3, CH $\equiv$ CCH<sub>2</sub>OH and NO<sub>3</sub> partition functions, respectively.  $E_I$  is the barrier of h-TS1 and h-TS3. The unsymmetrical Eckart potential model is employed to estimate  $\kappa_1$  [2,3].

[1] I. W. M. Smith, Kinetics and Dynamics of Elementary Gas Reactions; Butterworth, London, 1980, p118.

[2] H. S. Johnston and J. Heicklen, Tunnelling Corrections for Unsymmetrical Eckart Potential Energy Barriers. J. Phys. Chem. 66 (1962)532–533.

[3] C. Eckart, The Penetration of a Potential Barrier by Electrons. Phys. Rev. 35(1930)1303–1309.

Gibbs free energy of solute in aqueous solution can be calculated as follows (Ribeiro et al., 2011):

$$G_{\text{aq}} = G_{\text{g}} + G_{\text{diss}}$$

$$G_{\text{diss}} = sp_{\text{aq}} - sp_{\text{g}} + 1.89 \text{ (kcal/mol)}$$

Where  $G_{\text{aq}}$  is Gibbs free energy of solute in aqueous solution,  $G_{\text{g}}$  is Gibbs free energy of solute in gas-phase,  $G_{\text{diss}}$  is dissolved free energy of solute, and  $sp_{\text{aq}}$  is single point energy of solute in aqueous solution calculated at M06-2X/6-311++G(3df,2p) level with “PCM” model based on the structure optimized in gas-phase at M06-2X/6-311G(d,p) level. And  $sp_{\text{g}}$  is single point energy of solute in gas-phase calculated at M06-2X/6-311G(d,p) level.

#### References

Ribeiro, R.F., Marenich, A.V., Cramer, C.J., Truhlar, D.G., 2011. Use of Solution-Phase Vibrational Frequencies in Continuum Models for the Free Energy of Solvation. *J. Phys. Chem. B.* 115, 14556-14562.

**Table S1.** The values of  $G_{\text{aq}}$ ,  $G_{\text{g}}$ ,  $sp_{\text{aq}}$  and  $sp_{\text{g}}$  for the reactants, intermediates, transition states and products. Units of these energies are hartree.

| Species                               | $G_{\text{g}}$ | $sp_{\text{aq}}$ | $sp_{\text{g}}$ | $G_{\text{aq}}$ |
|---------------------------------------|----------------|------------------|-----------------|-----------------|
| CH≡CCH <sub>2</sub> OH                | -191.52        | -191.49          | -191.49         | -191.52         |
| NO <sub>3</sub>                       | -279.86        | -279.83          | -279.83         | -279.86         |
| h-TS2-if-f                            | -471.32        | 0.073322         | -471.28         | 0.035666        |
| IM1                                   | -471.38        | -471.36          | -471.35         | -471.39         |
| IM2                                   | -471.38        | -471.36          | -471.34         | -471.39         |
| IM3                                   | -471.40        | -471.37          | -471.36         | -471.40         |
| IM4                                   | -471.43        | -471.41          | -471.40         | -471.44         |
| IM5                                   | -471.40        | -471.37          | -471.36         | -471.40         |
| TS1                                   | -471.35        | -471.32          | -471.32         | -471.36         |
| TS2                                   | -471.34        | —                | -471.31         | —               |
| TS3                                   | -471.34        | -471.32          | -471.31         | -471.35         |
| TS4                                   | -471.32        | —                | -471.29         | —               |
| TS5                                   | -471.36        | -471.33          | -471.32         | -471.36         |
| TS6                                   | -471.33        | -471.30          | -471.30         | -471.33         |
| TS7                                   | -471.36        | -471.34          | -471.33         | -471.36         |
| TS8                                   | -471.42        | -471.39          | -471.38         | -471.42         |
| TS9                                   | -471.36        | -471.33          | -471.32         | -471.36         |
| TS10                                  | -471.36        | -471.33          | -471.32         | -471.37         |
| TS11                                  | -471.32        | -471.30          | -471.29         | -471.34         |
| TS12                                  | -471.33        | -471.30          | -471.29         | -471.34         |
| TS13                                  | -471.36        | -471.33          | -471.33         | -471.37         |
| H-TS1                                 | -471.35        | -471.32          | -471.32         | -471.36         |
| H-TS2                                 | -471.32        | -471.30          | -471.28         | -471.33         |
| H-TS3                                 | -471.34        | -471.29          | -471.31         | -471.33         |
| CHONO <sub>2</sub> CHCHO              | -470.87        | -470.85          | -470.84         | -470.88         |
| CH <sub>2</sub> CONO <sub>2</sub> CHO | -470.88        | -470.85          | -470.84         | -470.88         |
| CHOCHCHOH                             | -266.68        | -266.67          | -266.66         | -266.70         |
| CH <sub>2</sub> COHCHO                | -266.69        | -266.67          | -266.66         | -266.70         |
| CHCOCH <sub>2</sub> OH                | -266.56        | -266.54          | -266.53         | -266.57         |
| CHCCHOH                               | -190.88        | -190.86          | -190.85         | -190.89         |
| CCCH <sub>2</sub> OH                  | -190.80        | -190.78          | -190.78         | -190.81         |
| CHCCH <sub>2</sub> O                  | -190.85        | -190.83          | -190.821        | -190.85         |
| CH <sub>2</sub> OH                    | -114.87        | -114.85          | -114.85         | -114.87         |
| HCCO                                  | -151.68        | -151.66          | -151.66         | -151.68         |
| HNO <sub>3</sub>                      | -280.52        | -280.50          | -280.49         | -280.52         |
| NO <sub>2</sub>                       | -204.81        | -204.79          | -204.79         | -204.82         |
| H                                     | -0.51          | -0.50            | -0.50           | -0.51           |

**Table S2.** The  $T_1$  diagnostic value, zero-point energy (ZPE), potential barriers, reaction heat, Gibbs free energy for the transition states, intermediates and products of the  $\text{NO}_3 + \text{CH}\equiv\text{CCH}_2\text{OH}$  reactions in gaseous and aqueous phase. Units of  $\Delta E_{(\text{gas})}$ ,  $\Delta H_{(\text{gas})}$ ,  $\Delta G_{(\text{gas})}$ ,  $\Delta E_{(\text{aq})}$  and  $\Delta G_{(\text{aq})}$  are kcal/mol.

| Species                                              | ZPE   | $T_1$          | $\Delta E_{(\text{gas})}$ | $\Delta H_{(\text{gas})}$ | $\Delta G_{(\text{gas})}$ | $\Delta E_{(\text{aq})}$ | $\Delta G_{(\text{aq})}$ |
|------------------------------------------------------|-------|----------------|---------------------------|---------------------------|---------------------------|--------------------------|--------------------------|
| $\text{CH}\equiv\text{CCH}_2\text{OH} + \text{NO}_3$ | 45.00 | 0.011<br>0.023 | 0.00                      | 0.00                      | 0.00                      | 0.00                     | 0.00                     |
| COMP1                                                | 46.56 | 0.023          | 25.82                     | 25.84                     | 35.19                     | 19.88                    | 29.25                    |
| IM1                                                  | 48.53 | 0.028          | -16.05                    | -16.77                    | -4.76                     | -15.98                   | -4.69                    |
| IM2                                                  | 48.80 | 0.026          | -15.85                    | -16.45                    | -5.40                     | -16.41                   | -5.36                    |
| IM3                                                  | 47.86 | 0.021          | -26.38                    | -27.34                    | -14.84                    | -25.26                   | -13.73                   |
| IM4                                                  | 48.60 | 0.025          | -48.61                    | -49.55                    | -36.87                    | -47.80                   | -36.07                   |
| IM5                                                  | 48.19 | 0.021          | -24.85                    | -25.78                    | -14.02                    | -24.06                   | -13.22                   |
| H-TS1                                                | 45.66 | 0.034          | 4.86                      | 4.19                      | 15.66                     | 5.00                     | 15.68                    |
| H-TS2                                                | 45.48 | 0.026          | 25.98                     | 25.54                     | 36.12                     | 21.64                    | 37.79                    |
| H-TS3                                                | 43.18 | 0.040          | 9.94                      | 9.31                      | 20.66                     | 10.56                    | 31.28                    |
| TS1                                                  | 47.26 | 0.029          | 4.76                      | 4.14                      | 15.52                     | 4.53                     | 15.76                    |
| TS2                                                  | 46.82 | 0.030          | 8.22                      | 7.92                      | 17.77                     | —                        | —                        |
| TS3                                                  | 47.79 | 0.024          | 8.01                      | 7.08                      | 19.50                     | 7.59                     | 19.07                    |
| TS4                                                  | 45.10 | 0.035          | 21.23                     | 21.36                     | 31.19                     | —                        | —                        |
| TS5                                                  | 45.27 | 0.030          | 0.96                      | -0.29                     | 12.84                     | 2.15                     | 14.03                    |
| TS6                                                  | 45.51 | 0.029          | 15.32                     | 14.25                     | 27.04                     | 16.17                    | 27.89                    |
| TS7                                                  | 42.97 | 0.026          | -3.76                     | -4.50                     | 7.71                      | -2.54                    | 8.94                     |
| TS9                                                  | 43.01 | 0.036          | -2.39                     | -3.10                     | 9.22                      | -1.95                    | 9.65                     |
| TS8                                                  | 47.36 | 0.030          | -39.88                    | -40.78                    | -28.37                    | -39.81                   | -28.30                   |
| TS10                                                 | 46.72 | 0.042          | -3.12                     | -3.40                     | 6.24                      | -3.32                    | 6.34                     |
| TS11                                                 | 45.76 | 0.026          | 20.17                     | 19.22                     | 31.32                     | 17.82                    | 28.97                    |

|                                                   |       |                         |        |        |        |        |        |
|---------------------------------------------------|-------|-------------------------|--------|--------|--------|--------|--------|
| TS12                                              | 45.73 | 0.028                   | 15.53  | 14.48  | 26.66  | 16.66  | 27.79  |
| TS13                                              | 43.40 | 0.036                   | -3.64  | -4.33  | 7.20   | -4.02  | 6.82   |
| P1:(CH <sub>2</sub> OH + HCCO + NO <sub>2</sub> ) | 40.47 | 0.014<br>0.024<br>0.024 | 11.96  | 13.33  | 1.14   | 11.41  | 0.58   |
| P2:(CH <sub>2</sub> CONO <sub>2</sub> CHO + H)    | 42.36 | 0.018                   | -11.89 | -11.66 | -6.08  | -11.82 | -6.02  |
| P3:(CH <sub>2</sub> COHCHO + NO <sub>2</sub> )    | 47.22 | 0.015<br>0.024          | -85.94 | -86.41 | -85.00 | -85.15 | -84.21 |
| P4:(CHCOCH <sub>2</sub> OH + NO <sub>2</sub> )    | 44.80 | 0.019<br>0.024          | -3.12  | -2.84  | -3.18  | -5.92  | -5.99  |
| P5:(CHOCHCHOH + NO <sub>2</sub> )                 | 47.27 | 0.016<br>0.024          | -81.40 | -81.64 | -80.76 | -83.01 | -82.36 |
| P6:(CHONO <sub>2</sub> CHCHO + H)                 | 42.60 | 0.018                   | -11.49 | -11.15 | -6.67  | -11.25 | -6.43  |
| h-P1: (CHCCHOH + HNO <sub>3</sub> )               | 46.05 | 0.032<br>0.018          | -18.82 | -18.94 | -18.98 | -21.16 | -21.33 |
| h-P2: (CCCH <sub>2</sub> OH + HNO <sub>3</sub> )  | 46.04 | 0.062<br>0.018          | 32.15  | 31.94  | 31.82  | 27.74  | 27.42  |
| h-P3: (CHCCH <sub>2</sub> O + HNO <sub>3</sub> )  | 45.44 | 0.018<br>0.018          | 2.19   | 1.85   | 2.10   | -0.22  | -0.31  |

**Table S3** The harmonic vibrational frequencies (imaginary frequency is suffixed with *i*), the moment of inertia ( $I_a$ ,  $I_b$  and  $I_c$ ), rotational constants (GHZ) and the number of imaginary frequencies of all the species in the  $\text{NO}_3 + \text{CH}\equiv\text{CCH}_2\text{OH}$  reactions in gaseous.

| Species                                | Frequencies ( $\text{cm}^{-1}$ )                                                                                                                                | $I_a, I_b, I_c$ (amu bohr <sup>2</sup> ) | Rotational constants (GHZ)  | the number of imaginary frequencies |
|----------------------------------------|-----------------------------------------------------------------------------------------------------------------------------------------------------------------|------------------------------------------|-----------------------------|-------------------------------------|
| $\text{CH}\equiv\text{CCH}_2\text{OH}$ | 198, 280, 349, 557, 663, 708, 913, 990, 1043, 1213, 1347, 1412, 1490, 2214, 2997, 3079, 3475, 3828                                                              | 54.77812, 387.34460, 427.75128           | 32.94639, 4.65927, 4.21914  | 0                                   |
| $\text{NO}_3$                          | 282, 285, 800, 1106, 1110, 1130                                                                                                                                 | 130.43940, 130.53852, 260.97792          | 13.83586, 13.82535, 6.91530 | 0                                   |
| COMP1                                  | 40, 49, 72, 87, 96, 197, 221, 225, 349, 546, 640, 692, 783, 856, 897, 959, 976, 1073, 1214, 1226, 1234, 1404, 1428, 1511, 1705, 2003, 2371, 2933, 2949, 3828    | 277.94312, 2596.55844, 2765.93259        | 6.49320, 0.69505, 0.65249   | 0                                   |
| IM1                                    | 60, 67, 103, 184, 238, 313, 344, 423, 487, 545, 669, 732, 741, 756, 809, 883, 991, 1035, 1094, 1211, 1340, 1351, 1406, 1491, 1682, 1754, 3002, 3119, 3282, 3821 | 531.66389, 1231.62788, 1424.90544        | 3.39452, 1.46533, 1.26657   | 0                                   |
| IM2                                    | 33, 51, 88, 154, 209, 226, 306, 438, 524, 585, 699, 748, 801, 828, 910, 988, 1012, 1054, 1232, 1240, 1304, 1344, 1423, 1474, 1738, 1762, 2929, 2989, 3197, 3835 | 317.38322, 2077.96372, 2162.57462        | 5.68632, 0.86851, 0.83453   | 0                                   |
| IM3                                    | 67, 81, 85, 192, 261, 392, 415, 440, 560, 613, 677, 738, 783, 819, 878, 960, 965, 1081, 1151, 1184, 1327, 1349, 1374, 1406, 1711, 1749, 2880, 1711, 1749, 2880  | 412.66753, 1412.36698, 1560.59436        | 4.37335, 1.27781, 1.15644   | 0                                   |
| IM4                                    | 56, 72, 192, 220, 254, 386, 420, 474, 511, 548, 634, 685, 715, 738, 766, 803, 919, 949, 1170, 1258, 1283, 1170, 1258, 1283, 1532, 1769, 3168, 3227, 3270, 3750  | 567.89069, 1101.69041, 1387.73374        | 3.17797, 1.63816, 1.30050   | 0                                   |



|     |                                                                                                                                                                           |                                   |                           |   |
|-----|---------------------------------------------------------------------------------------------------------------------------------------------------------------------------|-----------------------------------|---------------------------|---|
| IM5 | 29, 60, 89, 167, 256, 337,450, 528, 572, 627, 730, 755, 766, 825, 951, 977, 1062, 1073, 1150, 1234, 1315, 1323, 1358, 1415, 1701, 1754, 2846, 2945, 3181, 3223            | 311.70464, 1964.54065, 2136.26139 | 5.78991, 0.91866, 0.84481 | 0 |
| TS1 | 316 <i>i</i> , 51, 69, 109, 148, 200, 254, 310, 425, 565, 584, 632,674, 686., 788, 869, 911, 985, 1067, 1212, 1298, 1353, 1411, 1482,1611, 2004, 3020, 3088, 3440, 3797   | 562.12058, 1286.86034, 1508.11070 | 3.21059, 1.40244, 1.19669 | 1 |
| TS2 | 281 <i>i</i> , 24, 42, 67, 119, 166, 183, 221, 341, 556, 605, 678,709, 785, 843, 891, 921, 972, 1063, 1227, 1248, 1295, 1432, 1467,1591, 2078, 2960, 2989, 3431, 3833     | 380.75933, 2179.54336, 2222.15450 | 4.73985, 0.82804, 0.81216 | 1 |
| TS3 | 353 <i>i</i> , 47, 98, 108, 188, 280, 287, 398, 429, 562, 686, 695, 719, 752, 787, 904, 959, 1035, 1068, 1130, 1216, 1361, 1410, 1470, 1534, 1995, 3009, 3074, 3417, 3795 | 457.50953, 1281.51596, 1653.32221 | 3.94471, 1.40829, 1.09158 | 1 |
| TS4 | 381 <i>i</i> , 39, 65, 83, 109, 146, 222, 276, 313,380, 448, 468, 517, 535, 583, 653, 785, 901, 1085, 1089, 1200, 1353, 1375, 1493, 1824, 1956, 3113, 3255, 3457, 3807    | 558.10155, 1460.61181, 1956.48968 | 3.23371, 1.23561, 0.92244 | 1 |
| TS5 | 1915 <i>i</i> , 60, 74, 123, 234, 375, 392, 446, 540, 623, 667, 723,739, 796, 808, 888, 974, 1027, 1047, 1182, 1194, 1329, 1364, 1499, 1641, 1780, 1805, 3017, 3059, 3249 | 348.48926, 1479.13211, 1580.17955 | 5.17876, 1.22014, 1.14211 | 1 |
| TS6 | 1983 <i>i</i> , 57, 70, 175, 209, 257, 374, 411, 467, 578, 640, 685,733, 771, 807, 856, 927, 973,1114, 1142, 1230,1270, 1348, 1420, 1627, 1762, 1805, 3139, 3173, 3799    | 510.74942, 1278.42481, 1454.41234 | 3.53352, 1.41169, 1.24087 | 1 |
| TS7 | 770 <i>i</i> , 60, 78, 118, 192, 267, 330, 392, 418, 442, 498, 600, 667, 737, 774, 815, 896, 970, 984, 1014, 1202, 1345, 1389, 1403, 1659, 1698, 1762, 2914, 3161, 3262,  | 434.51565, 1357.97800, 1515.62547 | 4.15346, 1.32899, 1.19076 | 1 |
| TS8 | 516 <i>i</i> , 62, 63, 130, 245, 251, 335, 354, 427, 335, 354, 427, 683,                                                                                                  | 580.10281, 1194.37439,            | 3.11107, 1.51103, 1.26608 | 1 |

|       |                                                                                                                                                                   |                                   |                           |   |
|-------|-------------------------------------------------------------------------------------------------------------------------------------------------------------------|-----------------------------------|---------------------------|---|
|       | 771, 781, 921, 933, 976, 1215, 1254, 1285,1346, 1375, 1473, 1545, 1777, 3161,3210, 3267, 3547                                                                     | 1425.45255                        |                           |   |
| TS9   | 999i, 73, 91, 153, 160, 193, 277, 366, 461, 476, 523, 623,679,738, 752, 814, 902, 950, 966, 987, 1265, 1356, 1370, 1430, 1639, 1654, 1772, 2983, 3160, 3257       | 584.13969, 1003.57795, 1299.13055 | 3.08957, 1.79831, 1.38919 | 1 |
| TS10  | 283i, 24, 29, 53, 139, 157, 212, 308, 322, 372, 461, 679, 747, 885, 932, 954, 1056, 1194, 1220, 1226, 1349, 1369, 1406, 1461, 1511, 1783, 2944, 2971, 3069, 3839  | 429.98487, 1967.91452, 2105.26419 | 4.19722, 0.91708, 0.85725 | 1 |
| TS11  | 1488i, 29, 75, 144, 218, 231, 331, 422, 472, 516, 618, 673, 715, 736, 800, 938, 1002, 1021, 1072, 1208, 1252,1311, 1353, 1431, 1530, 1738, 2080, 3039, 3227, 3813 | 295.74194, 2050.48452, 2220.1595  | 6.10242, 0.88015, 0.81289 | 1 |
| TS12  | 2092i,35, 73, 92, 169, 251, 374, 418, 589,607, 714, 738, 790, 814, 865, 904, 980, 1033, 1071, 1126, 1283, 1320, 1369, 1498, 1750, 1778, 1982, 3042, 3090, 3219    | 248.98601, 2104.25302, 2257.22994 | 7.24836, 0.85766, 0.79954 | 1 |
| TS13  | 818i, 25, 89, 115, 130, 273, 309, 382, 404, 471, 564, 574, 720, 782, 785, 817, 970, 1001, 1023, 1140, 1233, 1323, 1366, 1420, 1633, 1678, 1778, 2930, 3192, 3217  | 265.05926, 2046.45843, 2280.73425 | 6.80882, 0.88189, 0.79130 | 1 |
| H-TS1 | 235i, 45, 62, 117, 140, 209, 219, 344, 479, 570, 599, 683, 686, 711, 794, 866, 934, 958, 1119, 1206, 1256, 1306, 1348, 1418, 1514, 1909, 2180, 3085, 3467, 3704   | 517.47721, 1655.24592, 1822.18170 | 3.48758, 1.09032, 0.99043 | 1 |
| H-TS2 | 264i, 46, 56, 77, 101, 180, 211, 219, 345, 539, 582, 696, 784, 854, 907, 968, 1062, 1073, 1085, 1221, 1231, 1410,1434, 1512, 1611, 1838, 2032, 2938, 2956, 3828   | 269.47381, 2535.43166, 2694.46984 | 6.69728, 0.71181, 0.66979 | 1 |
| H-TS3 | 1550i, 41, 63, 98, 140, 210, 252, 299, 442, 566, 688, 695,716, 758, 792, 797, 920, 1000, 1086, 1138, 1171, 1266, 1301, 1346,                                      | 493.66831, 1661.01040, 1826.68558 | 3.65578, 1.08653, 0.98799 | 1 |

|                                       |                                                                                                                                                   |                                   |                               |   |
|---------------------------------------|---------------------------------------------------------------------------------------------------------------------------------------------------|-----------------------------------|-------------------------------|---|
|                                       | 1517, 1605, 2188, 2620, 3011, 3467                                                                                                                |                                   |                               |   |
| CHONO <sub>2</sub> CHCHO              | 21, 103, 118, 142, 275, 379, 401, 567, 572, 719, 784, 791, 816, 980, 1009, 1023, 1154, 1235, 1326, 1382, 1438, 1665, 1754, 1782, 2944, 3190, 3213 | 247.38772, 2017.65178, 2265.03938 | 7.29519, 0.89448, 0.79678     | 0 |
| CH <sub>2</sub> CONO <sub>2</sub> CHO | 72, 91, 167, 185, 277, 364, 459, 517, 619, 683, 735, 760, 814, 893, 969, 976, 1015, 1265, 1359, 1375, 1435, 1681, 1778, 1787, 2928, 3158, 3254    | 553.34506, 999.98173, 1267.99531  | 3.26151, 1.80477, 1.42330     | 0 |
| CHOCHCHOH                             | 188, 206, 256, 420, 445, 750, 845, 990, 992, 1026, 1170, 1249, 1341, 1366, 1428, 1667, 1763, 2904, 3161, 3183, 3843                               | 86.54011, 662.25077, 748.79088    | 20.85439, 2.72516, 2.41021    | 0 |
| CH <sub>2</sub> COHCHO                | 201, 282, 410, 525, 559, 681, 734, 892, 895, 981, 1001, 1256, 1366, 1397, 1446, 1707, 1745, 2975, 3164, 3258, 3682                                | 176.79662, 397.34630, 574.14289   | 10.20801, 4.54199, 3.14337    | 0 |
| CHCCHOH                               | 216, 322, 354, 423, 595, 604, 714, 985, 1205, 1293, 1439, 2038, 3228, 3467, 3807                                                                  | 37.52641, 382.24006, 419.76647    | 48.09256, 4.72149, 4.29939    | 0 |
| CCCH <sub>2</sub> OH                  | 190, 206, 314, 517, 853, 903, 1056, 1211, 1225, 1402, 1426, 1645, 2940, 2966, 3826                                                                | 48.84067, 367.93856, 403.22265    | 36.95161, 4.90501, 4.47579    | 0 |
| CHCCH <sub>2</sub> O                  | 208, 290, 537, 572, 676, 708, 912, 1049, 1138, 1310, 1369, 2215, 2902, 2903, 3473,                                                                | 43.31309, 384.96493, 417.48800    | 41.66734, 4.68807, 4.32286    | 0 |
| CH <sub>2</sub> OH                    | 405, 530, 1050, 1198, 1350, 1480, 3126, 3273, 3843                                                                                                | 9.32332, 60.44413, 69.21301       | 193.57276, 29.85801, 26.07517 | 0 |
| HNO <sub>3</sub>                      | 460, 586, 648, 773, 896, 1319, 1348, 1755, 3729                                                                                                   | 138.54720, 150.29389, 288.84109   | 13.02618, 12.0080, 6.24821    | 0 |
| NO <sub>2</sub>                       | 764, 1391, 1702                                                                                                                                   | 7.43909, 138.23124, 145.67032     | 242.60243, 13.05596, 12.38922 | 0 |

**Table S4** The Cartesian coordinates at the B3LYP/6-311++G(d,p) level of all the species in the  $\text{NO}_3 + \text{CH}\equiv\text{CCH}_2\text{OH}$  reactions in gaseous.

| Species                |   | Coordinates(Atom, X, Y, Z) |             |             |
|------------------------|---|----------------------------|-------------|-------------|
| CH≡CCH <sub>2</sub> OH | C | 0.77603300                 | 0.15430300  | -0.00237400 |
|                        | C | 1.91938000                 | -0.21748700 | -0.01353000 |
|                        | H | 2.92967000                 | -0.54674300 | -0.03233400 |
|                        | C | -0.62100800                | 0.58915300  | 0.03498300  |
|                        | H | -0.82327600                | 1.26437400  | -0.79956100 |
|                        | H | -0.79858800                | 1.15148600  | 0.96151200  |
|                        | O | -1.55319100                | -0.48277000 | -0.09868300 |
|                        | H | -1.32871200                | -1.16276900 | 0.54538100  |
| NO <sub>3</sub>        | N | 0.00000000                 | 0.00000000  | -0.00013300 |
|                        | O | 0.00000000                 | -1.06856200 | -0.61713000 |
|                        | O | 0.00000000                 | 1.06856200  | -0.61713000 |
|                        | O | 0.00000000                 | 0.00000000  | 1.23437600  |
| COMP1                  | C | 1.59081500                 | 0.47837500  | 0.22548900  |
|                        | C | 0.47880700                 | 1.05064700  | 0.04966100  |
|                        | H | -1.12954700                | 1.31796000  | -0.15181200 |
|                        | C | 2.88579500                 | -0.08680600 | 0.49872800  |
|                        | H | 2.71467000                 | -0.96720200 | 1.14432200  |
|                        | H | 3.44728500                 | 0.63608100  | 1.11564900  |
|                        | N | -2.19919600                | -0.23435200 | -0.01792700 |
|                        | O | -3.28258700                | -0.75026700 | -0.04155700 |
|                        | O | -1.12280400                | -0.81928100 | 0.17595400  |
|                        | O | -2.14864100                | 1.10051700  | -0.22049600 |
|                        | O | 3.58083100                 | -0.42560200 | -0.68652500 |
|                        | H | 4.41507200                 | -0.84260500 | -0.44494700 |
| IM1                    | C | -0.77803100                | 0.67192700  | -0.13582400 |
|                        | C | -0.98105600                | 1.94689300  | -0.34144000 |
|                        | H | -0.54200600                | 2.79446300  | -0.84075600 |
|                        | C | -1.65227300                | -0.28057300 | 0.63671600  |
|                        | H | -2.48520600                | 0.26995600  | 1.07246300  |
|                        | H | -1.07066500                | -0.72368300 | 1.45618000  |
|                        | N | 1.51368800                 | -0.15301700 | 0.06919900  |
|                        | O | 1.47346800                 | 0.31615400  | 1.17059300  |
|                        | O | 2.36148600                 | -0.76836300 | -0.49926600 |
|                        | O | 0.31603900                 | 0.04971200  | -0.79271500 |
|                        | O | -2.21673900                | -1.28799000 | -0.19222900 |
|                        | H | -1.50380800                | -1.77521000 | -0.62005100 |

|     |   |             |             |             |
|-----|---|-------------|-------------|-------------|
| IM2 | C | -1.41207900 | 0.64104000  | -0.43332200 |
|     | C | -0.12153000 | 0.81652500  | -0.55786500 |
|     | H | 0.36894200  | 1.76766100  | -0.72073800 |
|     | C | -2.42122900 | -0.41126700 | -0.29179000 |
|     | H | -1.89510900 | -1.36824300 | -0.12798900 |
|     | H | -2.98358500 | -0.50171700 | -1.23229700 |
|     | N | 1.98891800  | -0.12281300 | 0.14850900  |
|     | O | 2.67570200  | -1.09806000 | 0.09330300  |
|     | O | 2.17257800  | 0.94550000  | 0.66534700  |
|     | O | 0.72528400  | -0.30861300 | -0.56842600 |
|     | O | -3.28757400 | -0.10557700 | 0.79748500  |
|     | H | -3.97156400 | -0.78179700 | 0.83765900  |
| IM3 | C | -0.70876100 | 0.51467500  | -0.13715900 |
|     | C | -1.21514500 | 1.61676400  | 0.39756100  |
|     | H | -0.61740700 | 2.51379300  | 0.49161700  |
|     | C | -1.44203000 | -0.79082700 | -0.36052500 |
|     | H | -0.94310700 | -1.61295400 | 0.19477200  |
|     | H | -1.34339500 | -1.10973100 | -1.41695500 |
|     | N | 1.60950000  | -0.15976500 | 0.09054200  |
|     | O | 1.25426100  | -0.67079900 | 1.11774600  |
|     | O | 2.67490700  | -0.11860500 | -0.44070800 |
|     | O | 0.57652400  | 0.55781700  | -0.69026200 |
|     | O | -2.74588300 | -0.81151200 | 0.00943700  |
|     | H | -2.24544600 | 1.62837400  | 0.72780500  |
| IM4 | C | -0.88649800 | 0.57522600  | -0.21686300 |
|     | C | -0.96496700 | 1.95370100  | -0.20942600 |
|     | H | -0.15416200 | 2.55398200  | -0.59560200 |
|     | C | -1.84980300 | -0.32554900 | 0.21881200  |
|     | H | -1.83785800 | 2.45113300  | 0.19068100  |
|     | H | -2.79141700 | -0.00569200 | 0.64152800  |
|     | N | 1.44858300  | -0.09878300 | 0.10166200  |
|     | O | 1.33384700  | 0.35798800  | 1.19811000  |
|     | O | 2.36595000  | -0.61554500 | -0.45672700 |
|     | O | 0.23698500  | -0.03655700 | -0.79643900 |
|     | O | -1.71748300 | -1.66337000 | 0.13560300  |
|     | H | -0.90343200 | -1.86834600 | -0.34775200 |
| IM5 | C | -1.49131300 | 0.79563100  | -0.26121300 |
|     | C | -0.17068900 | 0.90017700  | -0.37369600 |
|     | H | 0.37268300  | 1.83122800  | -0.45391400 |
|     | C | -2.25867500 | -0.49114000 | -0.12761100 |
|     | H | -1.62843000 | -1.31850800 | 0.24220300  |
|     | H | -2.58083100 | -0.85948200 | -1.12771100 |
|     | N | 1.94039500  | -0.15545700 | 0.10005700  |

|     |   |             |             |             |
|-----|---|-------------|-------------|-------------|
|     | O | 2.55032000  | -1.17066900 | -0.03914300 |
|     | O | 2.24532500  | 0.89243600  | 0.59871500  |
|     | O | 0.59291700  | -0.25397500 | -0.47595100 |
|     | O | -3.40694600 | -0.40560800 | 0.60272500  |
|     | H | -2.07505400 | 1.70948200  | -0.27663000 |
| TS1 | C | -1.17668900 | 0.79012400  | -0.02051600 |
|     | C | -1.11265900 | 1.95408000  | -0.41657200 |
|     | H | -0.90503600 | 2.92155000  | -0.81187100 |
|     | C | -1.75556400 | -0.40188900 | 0.63031100  |
|     | H | -2.72392700 | -0.11937600 | 1.04998700  |
|     | H | -1.10040200 | -0.69754500 | 1.45862200  |
|     | N | 1.53848200  | -0.08471500 | 0.05809200  |
|     | O | 1.41935900  | 0.36162800  | 1.17968700  |
|     | O | 2.51370700  | -0.61582000 | -0.43171600 |
|     | O | 0.48147500  | -0.02136200 | -0.79425100 |
|     | O | -1.99113600 | -1.46170200 | -0.27226200 |
|     | H | -1.15777800 | -1.66746300 | -0.71438100 |
| TS2 | C | -1.47852000 | 0.65309300  | -0.32450900 |
|     | C | -0.42293100 | 1.27591000  | -0.30116900 |
|     | H | 0.24434100  | 2.10032900  | -0.19691000 |
|     | C | -2.58827600 | -0.27241900 | -0.44479100 |
|     | H | -2.20108900 | -1.17557200 | -0.94399400 |
|     | H | -3.34546200 | 0.16785700  | -1.11034300 |
|     | N | 2.01276500  | -0.16409000 | 0.09623000  |
|     | O | 2.86246600  | -0.98403100 | -0.19875300 |
|     | O | 2.00247300  | 0.57543900  | 1.05953000  |
|     | O | 1.00272300  | -0.10941800 | -0.79050800 |
|     | O | -3.12201300 | -0.56416100 | 0.83785600  |
|     | H | -3.81397800 | -1.22611300 | 0.73544700  |
| TS3 | C | -0.96218100 | 0.81001700  | 0.11427300  |
|     | C | -0.22437800 | 1.77390600  | -0.15776200 |
|     | N | 1.50655200  | -0.30153800 | 0.04475500  |
|     | O | 1.67255700  | 0.94615400  | -0.15025200 |
|     | O | 2.41695600  | -1.09187200 | -0.06535100 |
|     | O | 0.32480600  | -0.71508500 | 0.37532400  |
|     | H | 0.13267100  | 2.74701100  | -0.40923400 |
|     | C | -2.18522000 | 0.03105500  | 0.37280300  |
|     | H | -2.15801400 | -0.32358700 | 1.41114500  |
|     | H | -3.04483400 | 0.69921800  | 0.26912600  |
|     | O | -2.37099700 | -1.02739400 | -0.54223800 |
|     | H | -1.59159400 | -1.59616500 | -0.50007400 |
| TS4 | C | -0.41138000 | 0.94152400  | 0.08819800  |
|     | C | -0.36274600 | 2.16653200  | -0.05026000 |

|     |   |             |             |             |
|-----|---|-------------|-------------|-------------|
|     | H | -0.59897000 | 3.19173200  | -0.19994700 |
|     | C | -2.47222400 | -0.04961700 | 0.29999900  |
|     | H | -3.05317400 | 0.78013300  | -0.07803200 |
|     | H | -2.36192300 | -0.17537600 | 1.37227700  |
|     | N | 1.75751500  | -0.35711600 | -0.00643200 |
|     | O | 2.30113000  | 0.66305500  | -0.25313100 |
|     | O | 2.10312100  | -1.48222200 | 0.13177600  |
|     | O | 0.06654600  | -0.25216700 | 0.21851500  |
|     | O | -2.56952000 | -1.15249700 | -0.46895000 |
|     | H | -2.02065300 | -1.85666800 | -0.10257600 |
| TS5 | C | -0.66565000 | 0.42400900  | -0.15182800 |
|     | C | -1.40308400 | 1.29004500  | 0.53248700  |
|     | H | -1.27508500 | 2.28501000  | 0.93168900  |
|     | C | -1.45128000 | -0.80974300 | -0.52136200 |
|     | H | -1.02921900 | -1.72320200 | -0.08996800 |
|     | H | -1.52242300 | -0.91479900 | -1.61025900 |
|     | N | 1.68741700  | -0.12395500 | 0.09534500  |
|     | O | 1.33110100  | -0.81473100 | 1.00265600  |
|     | O | 2.75074100  | 0.07722000  | -0.39309600 |
|     | O | 0.60339000  | 0.68231300  | -0.60107500 |
|     | O | -2.73045600 | -0.53693300 | 0.04097400  |
| TS6 | H | -2.50331200 | 0.53185400  | 0.54966100  |
|     | C | -0.72036800 | 0.64487100  | -0.06877700 |
|     | C | -1.46490900 | 1.72821500  | 0.12572700  |
|     | H | -1.34081500 | 2.79484300  | -0.03412400 |
|     | C | -1.59726900 | -0.45922200 | 0.42479000  |
|     | H | -2.37494100 | 0.67812300  | 0.62130100  |
|     | H | -1.41180400 | -0.85940400 | 1.41901600  |
|     | N | 1.57371100  | -0.10072000 | 0.07090100  |
|     | O | 1.32014700  | -0.34857600 | 1.21518000  |
|     | O | 2.55488100  | -0.26881800 | -0.58133500 |
|     | O | 0.48810700  | 0.55103800  | -0.72448000 |
| TS7 | O | -2.00796100 | -1.46496700 | -0.41764000 |
|     | H | -2.03453700 | -1.14112500 | -1.32673700 |
|     | C | -0.71433500 | 0.53938500  | -0.12687300 |
|     | C | -1.24839600 | 1.62366500  | 0.43021200  |
|     | H | -0.67536900 | 2.53393100  | 0.54856300  |
|     | C | -1.44511000 | -0.75691500 | -0.31511600 |
|     | H | -0.82593400 | -1.58435200 | -0.71397500 |
|     | H | -1.69287700 | -0.46090300 | -2.13423600 |
|     | N | 1.58695600  | -0.16560100 | 0.10167200  |
|     | O | 1.20560000  | -0.70491400 | 1.10183700  |
|     | O | 2.65638100  | -0.11555600 | -0.41644000 |

|      |   |             |             |             |
|------|---|-------------|-------------|-------------|
|      | O | 0.56469200  | 0.59967600  | -0.67132900 |
|      | O | -2.57494400 | -0.94952700 | 0.09905200  |
|      | H | -2.28130400 | 1.59629000  | 0.75364300  |
| TS8  | C | -0.96109100 | 0.56882200  | -0.23876300 |
|      | C | -1.16374900 | 1.93182200  | 0.03354300  |
|      | H | -0.50152000 | 2.67302200  | -0.39071000 |
|      | C | -1.81463900 | -0.43286400 | 0.24567100  |
|      | H | -1.98597600 | 2.25647100  | 0.65723600  |
|      | H | -2.71265800 | -0.24718700 | 0.82192000  |
|      | N | 1.56056900  | -0.08277600 | 0.12292600  |
|      | O | 1.31986300  | -0.03369400 | 1.28842100  |
|      | O | 2.55625700  | -0.21952700 | -0.50658200 |
|      | O | 0.04482200  | 0.10690700  | -0.96941100 |
|      | O | -1.58408400 | -1.70238600 | -0.01416300 |
|      | H | -0.78181500 | -1.71995500 | -0.57775700 |
| TS9  | C | -1.01128800 | 0.51888100  | -0.11798200 |
|      | C | -1.76670600 | 1.57934100  | 0.19277700  |
|      | H | -1.39102500 | 2.58779500  | 0.08101100  |
|      | C | -1.50044200 | -0.86413700 | -0.02391400 |
|      | H | -2.78631200 | 1.44113400  | 0.53053600  |
|      | H | -2.50466300 | -0.97519400 | 0.41662800  |
|      | N | 1.35976600  | 0.16923500  | 0.11269600  |
|      | O | 1.10448200  | -0.14730200 | 1.23845400  |
|      | O | 2.37325300  | 0.16120600  | -0.50737800 |
|      | O | 0.23049700  | 0.71996800  | -0.69145600 |
|      | O | -0.85012900 | -1.83787100 | -0.39118900 |
|      | H | -0.03056600 | -2.81089700 | 0.69022200  |
| TS10 | C | -1.40595000 | 0.66645700  | 0.42520000  |
|      | C | -0.18261000 | 1.26286500  | 0.50465600  |
|      | H | 0.07113000  | 1.88443900  | 1.36771200  |
|      | C | -2.12315700 | -0.18462600 | -0.53010300 |
|      | H | -1.42569500 | -0.95384000 | -0.90141400 |
|      | H | -2.41749200 | 0.43261000  | -1.39396200 |
|      | N | 1.98653200  | -0.34406800 | 0.00865500  |
|      | O | 2.88680000  | -0.39696300 | -0.75881900 |
|      | O | 1.67131200  | -0.95575900 | 0.97890600  |
|      | O | 0.68036100  | 1.10766300  | -0.44505100 |
|      | O | -3.25749300 | -0.76778000 | 0.10142700  |
|      | H | -3.71120400 | -1.32021400 | -0.54314400 |
| TS11 | C | -1.42463300 | 0.79980500  | -0.02252700 |
|      | C | -0.11795900 | 0.90895600  | -0.36869900 |
|      | H | 0.39667400  | 1.82666900  | -0.61119800 |
|      | C | -2.30758800 | -0.27271700 | -0.22897500 |



|       |      |             |             |             |
|-------|------|-------------|-------------|-------------|
|       | H    | -2.06525400 | -1.14300800 | -0.84704100 |
|       | H    | -2.41254300 | 0.86822200  | -0.90489200 |
|       | N    | 1.99694100  | -0.17686500 | 0.09984200  |
|       | O    | 2.58319500  | -1.21393400 | -0.00342200 |
|       | O    | 2.33904800  | 0.88601600  | 0.54069900  |
|       | O    | 0.63546400  | -0.26038200 | -0.46209900 |
|       | O    | -3.40534100 | -0.39814300 | 0.57421500  |
|       | H    | -4.01530900 | -1.03854800 | 0.19030700  |
| TS12  | C    | 1.46357100  | 0.28626800  | 0.13860800  |
|       | C    | 0.22457700  | 0.58166900  | 0.46936700  |
|       | H    | -0.11457800 | 1.54842600  | 0.81360500  |
|       | C    | 2.40343000  | -0.74898300 | -0.29081300 |
|       | H    | 2.31067600  | -1.07917400 | -1.32850400 |
|       | H    | 2.51947300  | -1.60288100 | 0.38068800  |
|       | N    | -2.03725700 | -0.03525000 | -0.08358100 |
|       | O    | -2.82052200 | -0.93279300 | -0.04670500 |
|       | O    | -2.14361000 | 1.09966500  | -0.45823300 |
|       | O    | -0.72514900 | -0.43817400 | 0.45485700  |
|       | O    | 3.48923600  | 0.22574800  | -0.12379200 |
|       | H    | 2.59612400  | 1.03108300  | 0.20729200  |
|       | TS13 | C           | 1.52070700  | 0.80809200  |
| C     |      | 0.18242900  | 0.84511300  | 0.09048500  |
| H     |      | -0.39938600 | 1.75631900  | 0.13329400  |
| C     |      | 2.33891500  | -0.41792600 | -0.05155600 |
| H     |      | 1.78370200  | -1.36721300 | -0.16737900 |
| H     |      | 2.22082600  | -0.82046100 | 1.72815400  |
| N     |      | -2.01359700 | -0.15725100 | -0.03199900 |
| O     |      | -2.55355900 | -1.21591100 | -0.02362900 |
| O     |      | -2.43548100 | 0.96014700  | -0.10968600 |
| O     |      | -0.54164900 | -0.31810800 | 0.08384900  |
| O     |      | 3.55336500  | -0.37975400 | -0.22338300 |
| H     |      | 2.05632200  | 1.74944700  | 0.09754700  |
| H-TS1 |      | C           | -2.11808500 | 0.52899600  |
|       | C    | -2.64669000 | 1.53104000  | -0.32419100 |
|       | H    | -3.12417900 | 2.40663400  | -0.69429800 |
|       | C    | -1.44863600 | -0.64376700 | 0.59830800  |
|       | H    | -1.93175900 | -1.06505400 | 1.48287900  |
|       | H    | -0.40559700 | -0.26134200 | 0.97711400  |
|       | N    | 1.72728200  | 0.15981300  | -0.06081800 |
|       | O    | 1.12328800  | -0.21887300 | -1.06064700 |
|       | O    | 2.88000000  | 0.54341100  | -0.03727600 |
|       | O    | 1.11158100  | 0.16515700  | 1.09566300  |
|       | O    | -1.19894600 | -1.66407500 | -0.30683600 |

|                                       |       |             |             |             |
|---------------------------------------|-------|-------------|-------------|-------------|
|                                       | H     | -0.67636500 | -1.30150700 | -1.04125900 |
| H-TS2                                 | C     | 1.54524400  | 0.45221800  | 0.23392300  |
|                                       | C     | 0.41958900  | 0.98343000  | 0.06022300  |
|                                       | H     | -1.04976500 | 1.30661200  | -0.14161100 |
|                                       | C     | 2.85924200  | -0.07568700 | 0.50068500  |
|                                       | H     | 2.72109200  | -0.95819200 | 1.15019300  |
|                                       | H     | 3.40780600  | 0.66647100  | 1.10517500  |
|                                       | N     | -2.17267000 | -0.21359400 | -0.02302900 |
|                                       | O     | -3.24318600 | -0.75706100 | -0.04507500 |
|                                       | O     | -1.08557800 | -0.80576000 | 0.17764200  |
|                                       | O     | -2.12121900 | 1.10218300  | -0.22209400 |
|                                       | O     | 3.54854800  | -0.40012900 | -0.69314600 |
|                                       | H     | 4.39658300  | -0.79336000 | -0.46016400 |
|                                       | H-TS3 | C           | 2.22747800  | -0.44692500 |
| C                                     |       | 2.76933900  | -1.43358300 | -0.40816700 |
| H                                     |       | 3.24869000  | -2.30093800 | -0.79490800 |
| C                                     |       | 1.58167100  | 0.73605300  | 0.56560200  |
| H                                     |       | 2.26387600  | 1.34324500  | 1.17536800  |
| H                                     |       | 0.79591200  | 0.36664600  | 1.29387800  |
| N                                     |       | -1.72241700 | -0.20778500 | 0.04942100  |
| O                                     |       | -1.11460900 | -0.31585900 | 1.11984200  |
| O                                     |       | -2.80710100 | -0.68650400 | -0.17797500 |
| O                                     |       | -1.16222000 | 0.47427600  | -0.93699000 |
| O                                     |       | 0.87958800  | 1.52153700  | -0.30359100 |
| H                                     |       | -0.08775400 | 0.96467000  | -0.68953500 |
| CHONO <sub>2</sub> CHCHO              |       | C           | -1.56803700 | 0.78760700  |
|                                       | C     | -0.22810000 | 0.82408200  | 0.00035000  |
|                                       | H     | 0.35116500  | 1.73854300  | 0.00062600  |
|                                       | C     | -2.37596200 | -0.43864000 | -0.00051200 |
|                                       | H     | -1.81824100 | -1.39335100 | -0.00157300 |
|                                       | N     | 1.98262400  | -0.15595500 | -0.00008300 |
|                                       | O     | 2.52761900  | -1.21121100 | 0.00009000  |
|                                       | O     | 2.39835600  | 0.96584000  | -0.00044100 |
|                                       | O     | 0.50340300  | -0.33131100 | 0.00053800  |
|                                       | O     | -3.58909000 | -0.42618000 | 0.00016500  |
|                                       | H     | -2.10100700 | 1.73108800  | 0.00006900  |
| CH <sub>2</sub> CONO <sub>2</sub> CHO | C     | 1.01642700  | -0.46279400 | -0.13366800 |
|                                       | C     | 1.80409500  | -1.50718300 | 0.12908200  |
|                                       | H     | 1.46003100  | -2.52341100 | -0.01271700 |
|                                       | C     | 1.47602200  | 0.94250400  | 0.02662400  |
|                                       | H     | 2.82255600  | -1.34813600 | 0.46201000  |
|                                       | H     | 2.49480700  | 1.03956500  | 0.45010800  |
|                                       | N     | -1.35768400 | -0.14233200 | 0.11831600  |

|                        |   |             |             |             |
|------------------------|---|-------------|-------------|-------------|
|                        | O | -1.11032100 | 0.09790500  | 1.26343500  |
|                        | O | -2.36285600 | -0.08806900 | -0.51154700 |
|                        | O | -0.22115400 | -0.66261000 | -0.70743100 |
|                        | O | 0.81272300  | 1.90191800  | -0.27693600 |
| CHOCHCHOH              | C | -0.02473200 | 0.71575500  | -0.00004500 |
|                        | C | -1.45646400 | 0.40670100  | 0.00008200  |
|                        | H | -2.12014600 | 1.29503500  | 0.00042500  |
|                        | C | 0.88252400  | -0.27334900 | 0.00008400  |
|                        | H | 0.56391100  | -1.31232600 | 0.00024400  |
|                        | H | 0.28843900  | 1.75370600  | -0.00016200 |
|                        | O | -1.93921000 | -0.71116900 | -0.00010700 |
|                        | O | 2.20929800  | -0.03479200 | -0.00011300 |
|                        | H | 2.69912200  | -0.86337700 | 0.00052400  |
| CH <sub>2</sub> COHCHO | C | 0.50750200  | 0.01474700  | 0.00003200  |
|                        | C | 1.66922600  | -0.65274000 | -0.00023400 |
|                        | H | 2.62292900  | -0.14177400 | -0.00053200 |
|                        | C | -0.78509400 | -0.70145200 | 0.00029800  |
|                        | H | 1.66144400  | -1.73447900 | 0.00012600  |
|                        | H | -0.74030600 | -1.80403800 | 0.00099400  |
|                        | O | 0.41709400  | 1.36227800  | 0.00019500  |
|                        | O | -1.83750900 | -0.09517700 | -0.00033200 |
|                        | H | -0.53055200 | 1.58014900  | -0.00007000 |
| CHCCHOH                | C | 0.72993800  | 0.16034200  | -0.00014100 |
|                        | C | 1.90008100  | -0.19076300 | 0.00024400  |
|                        | H | 2.92108000  | -0.48467200 | -0.00082200 |
|                        | C | -0.59014100 | 0.53609900  | 0.00010900  |
|                        | H | -0.91998300 | 1.56404000  | -0.00021400 |
|                        | O | -1.62169000 | -0.35732300 | -0.00004200 |
|                        | H | -1.26684900 | -1.25485100 | 0.00009600  |
|                        |   |             |             |             |
| CCCH <sub>2</sub> OH   | C | 0.87941100  | 0.07282500  | -0.13915200 |
|                        | C | 2.06674900  | -0.29367300 | 0.07804000  |
|                        | C | -0.47755400 | 0.54425200  | 0.02419500  |
|                        | H | -0.66794200 | 1.27893200  | -0.77727200 |
|                        | H | -0.52984200 | 1.10230000  | 0.97307300  |
|                        | O | -1.41515000 | -0.52035100 | -0.01550700 |
|                        | H | -2.29265700 | -0.15885000 | 0.14975900  |
|                        |   |             |             |             |
| CHCCH <sub>2</sub> O   | C | 0.73173600  | 0.11404000  | 0.00024600  |
|                        | C | 1.89756100  | -0.17776400 | -0.00002400 |
|                        | H | 2.92655700  | -0.44453000 | -0.00042200 |
|                        | C | -0.68787900 | 0.48163000  | -0.00002400 |
|                        | H | -0.91842000 | 1.13274400  | -0.86630500 |
|                        | H | -0.91856300 | 1.13407800  | 0.86518300  |
|                        | O | -1.59226000 | -0.54121600 | 0.00004500  |
|                        |   |             |             |             |

|                    |   |             |             |             |
|--------------------|---|-------------|-------------|-------------|
| HCCO               | C | 0.00000000  | 0.00000000  | -1.23902800 |
|                    | H | 0.00000000  | 0.00000000  | -2.30089500 |
|                    | C | 0.00000000  | 0.00000000  | 0.01897200  |
|                    | O | 0.00000000  | 0.00000000  | 1.20265400  |
| CH <sub>2</sub> OH | C | 0.68507700  | 0.02779300  | 0.05922500  |
|                    | H | 1.23590400  | -0.88864600 | -0.08991500 |
|                    | H | 1.11999500  | 0.99621300  | -0.15801100 |
|                    | O | -0.67044200 | -0.12553900 | -0.02133900 |
|                    | H | -1.10283100 | 0.72998200  | 0.06329100  |
| HNO <sub>3</sub>   | N | 0.00000000  | 0.15625600  | 0.00000000  |
|                    | O | -0.98240900 | 0.83466400  | 0.00000000  |
|                    | O | 1.16913700  | 0.46883500  | 0.00000000  |
|                    | O | -0.26444200 | -1.23577200 | 0.00000000  |
|                    | H | 0.62172100  | -1.63560100 | 0.00000000  |
| NO <sub>2</sub>    | N | 0.00000000  | 0.00000000  | 0.32172200  |
|                    | O | 0.00000000  | 1.10001400  | -0.14075300 |
|                    | O | 0.00000000  | -1.10001400 | -0.14075300 |

**Table S5** The calculated overall ( $k_{\text{overall}}$ ) and branching rate constants ( $k_{\text{H-TS1}}$ ,  $k_{\text{H-TS3}}$ ,  $k_{\text{IM1}}$ ,  $k_{\text{IM2}}$ ,  $k_{\text{IM3}}$ ,  $k_{\text{P2}}$  and  $k_{\text{P4}}$ ) of the  $\text{CH}\equiv\text{CCH}_2\text{OH} + \text{NO}_3$  reaction at the temperature of 200-2000 K and the experimental values ( $\text{cm}^3 \text{ molecule}^{-1} \text{ s}^{-1}$ ).

| T/K  | $k_{\text{H-TS1}}$    | $k_{\text{H-TS3}}$    | $k_{\text{IM1}}$      | $k_{\text{IM2}}$      | $k_{\text{IM3}}$      | $k_{\text{P2}}$       | $k_{\text{P4}}$       | $k_{\text{overall}}$  |
|------|-----------------------|-----------------------|-----------------------|-----------------------|-----------------------|-----------------------|-----------------------|-----------------------|
| 200  | $3.99\times 10^{-20}$ | $2.62\times 10^{-25}$ | $1.10\times 10^{-17}$ | $1.23\times 10^{-20}$ | $1.19\times 10^{-23}$ | $2.38\times 10^{-27}$ | $1.77\times 10^{-21}$ | $1.11\times 10^{-17}$ |
| 250  | $3.78\times 10^{-19}$ | $5.86\times 10^{-24}$ | $8.22\times 10^{-17}$ | $4.65\times 10^{-19}$ | $1.76\times 10^{-21}$ | $4.12\times 10^{-24}$ | $2.67\times 10^{-19}$ | $8.43\times 10^{-17}$ |
| 293  | $1.50\times 10^{-18}$ | $5.94\times 10^{-23}$ | $2.89\times 10^{-16}$ | $3.25\times 10^{-18}$ | $4.80\times 10^{-20}$ | $5.93\times 10^{-22}$ | $4.80\times 10^{-18}$ | $3.06\times 10^{-16}$ |
| 296  | $1.63\times 10^{-18}$ | $6.90\times 10^{-23}$ | $3.12\times 10^{-16}$ | $3.61\times 10^{-18}$ | $5.89\times 10^{-20}$ | $8.06\times 10^{-22}$ | $5.68\times 10^{-18}$ | $3.31\times 10^{-16}$ |
| 298  | $1.72\times 10^{-18}$ | $7.61\times 10^{-23}$ | $3.28\times 10^{-16}$ | $3.87\times 10^{-18}$ | $6.74\times 10^{-20}$ | $9.86\times 10^{-22}$ | $6.34\times 10^{-18}$ | $3.48\times 10^{-16}$ |
| 300  | $1.81\times 10^{-18}$ | $8.39\times 10^{-23}$ | $3.45\times 10^{-16}$ | $4.14\times 10^{-18}$ | $7.71\times 10^{-20}$ | $1.20\times 10^{-21}$ | $7.06\times 10^{-18}$ | $3.67\times 10^{-16}$ |
| 325  | $3.39\times 10^{-18}$ | $2.68\times 10^{-22}$ | $6.15\times 10^{-16}$ | $8.69\times 10^{-18}$ | $3.68\times 10^{-19}$ | $1.23\times 10^{-20}$ | $2.42\times 10^{-17}$ | $6.75\times 10^{-16}$ |
| 350  | $5.87\times 10^{-18}$ | $7.72\times 10^{-22}$ | $1.03\times 10^{-15}$ | $1.54\times 10^{-17}$ | $1.47\times 10^{-18}$ | $9.49\times 10^{-20}$ | $6.87\times 10^{-17}$ | $1.18\times 10^{-15}$ |
| 375  | $9.57\times 10^{-18}$ | $2.02\times 10^{-21}$ | $1.62\times 10^{-15}$ | $2.39\times 10^{-17}$ | $5.00\times 10^{-18}$ | $5.67\times 10^{-19}$ | $1.69\times 10^{-16}$ | $1.95\times 10^{-15}$ |
| 400  | $1.48\times 10^{-17}$ | $4.83\times 10^{-21}$ | $2.43\times 10^{-15}$ | $3.34\times 10^{-17}$ | $1.47\times 10^{-17}$ | $2.71\times 10^{-18}$ | $3.68\times 10^{-16}$ | $3.12\times 10^{-15}$ |
| 425  | $2.21\times 10^{-17}$ | $1.07\times 10^{-20}$ | $3.51\times 10^{-15}$ | $4.29\times 10^{-17}$ | $3.80\times 10^{-17}$ | $1.07\times 10^{-17}$ | $7.34\times 10^{-16}$ | $4.87\times 10^{-15}$ |
| 433  | $2.49\times 10^{-17}$ | $1.37\times 10^{-20}$ | $3.92\times 10^{-15}$ | $4.59\times 10^{-17}$ | $5.02\times 10^{-17}$ | $1.59\times 10^{-17}$ | $9.01\times 10^{-16}$ | $5.60\times 10^{-15}$ |
| 450  | $3.17\times 10^{-17}$ | $2.23\times 10^{-20}$ | $4.89\times 10^{-15}$ | $5.18\times 10^{-17}$ | $8.71\times 10^{-17}$ | $3.54\times 10^{-17}$ | $1.36\times 10^{-15}$ | $7.45\times 10^{-15}$ |
| 475  | $4.42\times 10^{-17}$ | $4.37\times 10^{-20}$ | $6.59\times 10^{-15}$ | $5.93\times 10^{-17}$ | $1.79\times 10^{-16}$ | $1.02\times 10^{-16}$ | $2.37\times 10^{-15}$ | $9.34\times 10^{-15}$ |
| 500  | $6.00\times 10^{-17}$ | $8.12\times 10^{-20}$ | $8.60\times 10^{-15}$ | $6.52\times 10^{-17}$ | $3.35\times 10^{-16}$ | $2.56\times 10^{-16}$ | $3.92\times 10^{-15}$ | $1.12\times 10^{-14}$ |
| 600  | $1.68\times 10^{-16}$ | $6.40\times 10^{-19}$ | $1.87\times 10^{-14}$ | $7.46\times 10^{-17}$ | $1.88\times 10^{-15}$ | $3.93\times 10^{-15}$ | $2.02\times 10^{-14}$ | $1.67\times 10^{-14}$ |
| 700  | $3.78\times 10^{-16}$ | $3.14\times 10^{-18}$ | $2.71\times 10^{-14}$ | $7.04\times 10^{-17}$ | $4.41\times 10^{-15}$ | $2.14\times 10^{-14}$ | $6.97\times 10^{-14}$ | $3.44\times 10^{-13}$ |
| 800  | $7.36\times 10^{-16}$ | $1.12\times 10^{-17}$ | $2.91\times 10^{-14}$ | $6.29\times 10^{-17}$ | $6.03\times 10^{-15}$ | $6.44\times 10^{-14}$ | $1.86\times 10^{-13}$ | $1.60\times 10^{-12}$ |
| 900  | $1.29\times 10^{-15}$ | $3.22\times 10^{-17}$ | $2.54\times 10^{-14}$ | $5.56\times 10^{-17}$ | $5.93\times 10^{-15}$ | $1.38\times 10^{-13}$ | $4.14\times 10^{-13}$ | $7.35\times 10^{-12}$ |
| 1000 | $2.11\times 10^{-15}$ | $7.83\times 10^{-17}$ | $1.96\times 10^{-14}$ | $4.97\times 10^{-17}$ | $4.79\times 10^{-15}$ | $2.44\times 10^{-13}$ | $8.15\times 10^{-13}$ | $3.23\times 10^{-11}$ |
| 1200 | $4.78\times 10^{-15}$ | $3.29\times 10^{-16}$ | $9.96\times 10^{-15}$ | $4.13\times 10^{-17}$ | $2.36\times 10^{-15}$ | $5.62\times 10^{-13}$ | $2.41\times 10^{-12}$ | $5.00\times 10^{-10}$ |
| 1400 | $9.31\times 10^{-15}$ | $1.01\times 10^{-15}$ | $5.11\times 10^{-15}$ | $3.62\times 10^{-17}$ | $1.07\times 10^{-15}$ | $1.06\times 10^{-12}$ | $5.63\times 10^{-12}$ | $5.82\times 10^{-9}$  |
| 1600 | $1.63\times 10^{-14}$ | $2.52\times 10^{-15}$ | $2.92\times 10^{-15}$ | $3.31\times 10^{-17}$ | $5.19\times 10^{-16}$ | $1.77\times 10^{-12}$ | $1.12\times 10^{-11}$ | $5.29\times 10^{-8}$  |
| 1800 | $2.64\times 10^{-14}$ | $5.40\times 10^{-15}$ | $1.87\times 10^{-15}$ | $3.11\times 10^{-17}$ | $2.83\times 10^{-16}$ | $2.75\times 10^{-12}$ | $1.99\times 10^{-11}$ | $3.93\times 10^{-7}$  |
| 2000 | $4.03\times 10^{-14}$ | $1.04\times 10^{-14}$ | $1.32\times 10^{-15}$ | $2.97\times 10^{-17}$ | $1.72\times 10^{-16}$ | $3.95\times 10^{-12}$ | $3.19\times 10^{-11}$ | $2.46\times 10^{-6}$  |

**Table S6.** The acute and chronic toxicity class ( $\text{mg L}^{-1}$ ).

| Classification     | Acute toxicity <sup>1</sup>                                | Chronic toxicity <sup>2</sup> |
|--------------------|------------------------------------------------------------|-------------------------------|
| <b>Not harmful</b> | $\text{LC}_{50} > 100$ or $\text{EC}_{50} > 100$           | $\text{ChV} > 10$             |
| <b>Harmful</b>     | $10 < \text{LC}_{50} < 100$ or $10 < \text{EC}_{50} < 100$ | $1 < \text{ChV} < 10$         |
| <b>Toxic</b>       | $1 < \text{LC}_{50} < 10$ or $1 < \text{EC}_{50} < 10$     | $0.1 < \text{ChV} < 1$        |
| <b>Very toxic</b>  | $\text{LC}_{50} < 1$ or $\text{EC}_{50} < 1$               | $\text{ChV} < 0.1$            |

<sup>1</sup>Criteria set by the European Union (described in Annex VI of Directive 67/548/EEC);

<sup>2</sup>Criteria set by the Chinese hazard evaluation guidelines for new chemical substances (HJ/T 154–2004).

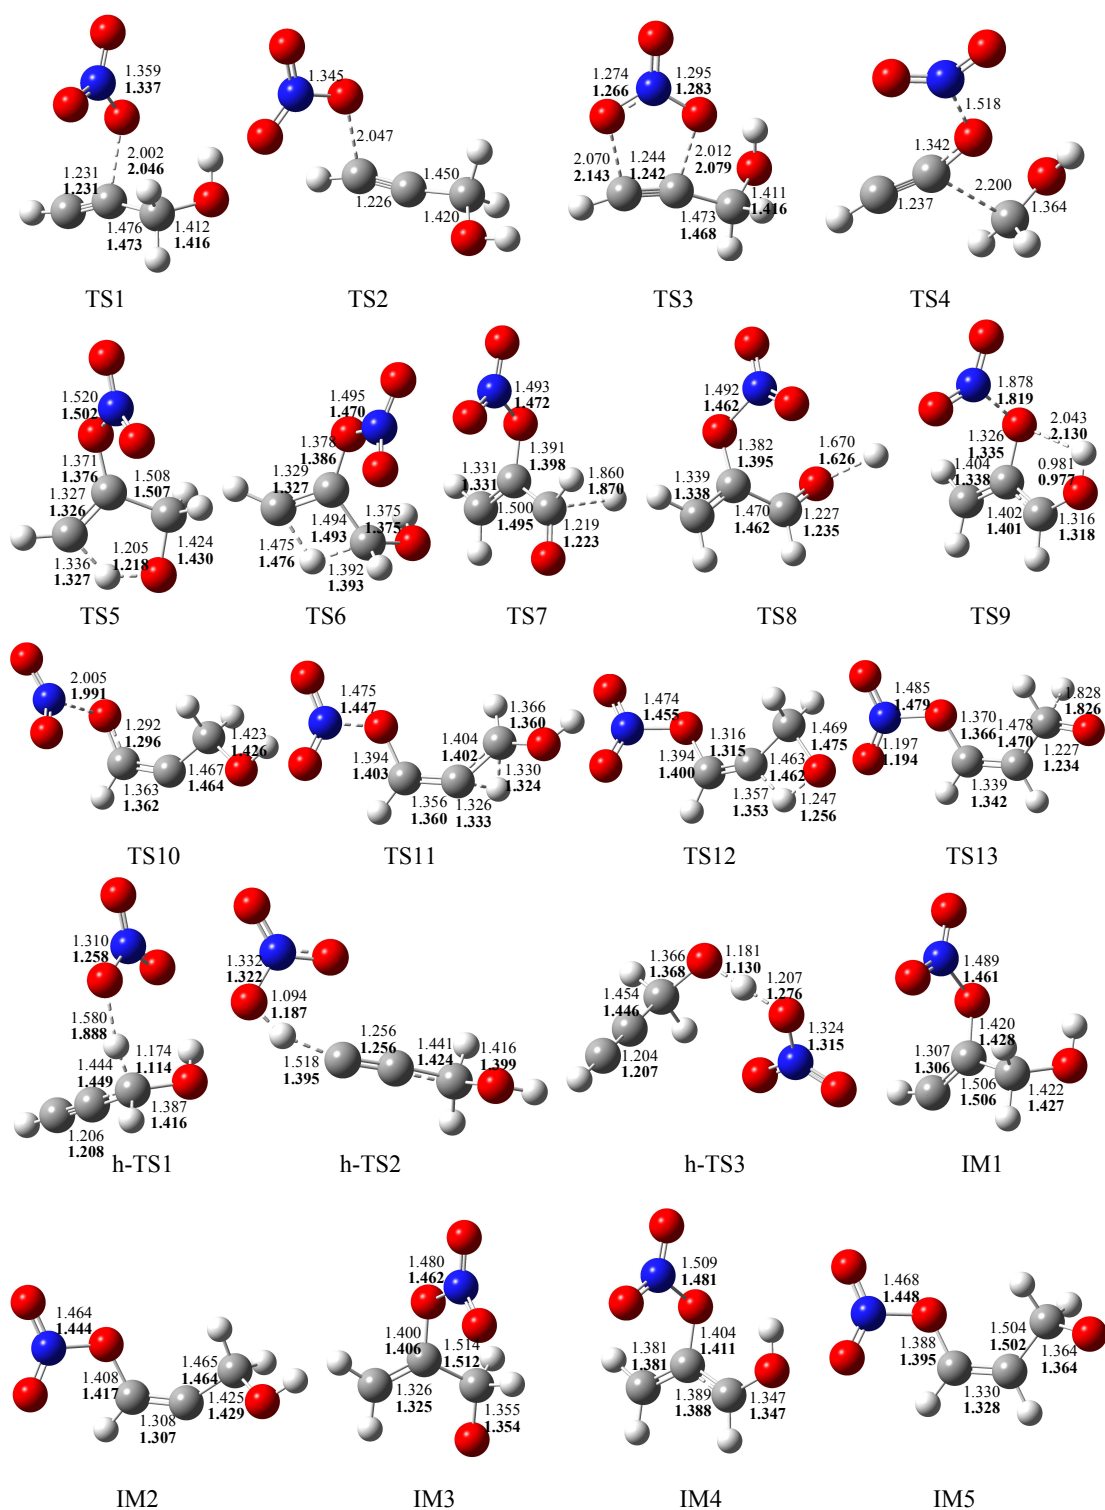

**Fig S1.** The optimized geometries for all the transition states and intermediates on the PESs involved in  $\text{NO}_3 + \text{CH}\equiv\text{CCH}_2\text{OH}$  reaction using B3LYP method. Bond distances are in Å. The first and bold values represents the gaseous phase and aqueous phase under the implicit water model (PCM), respectively.

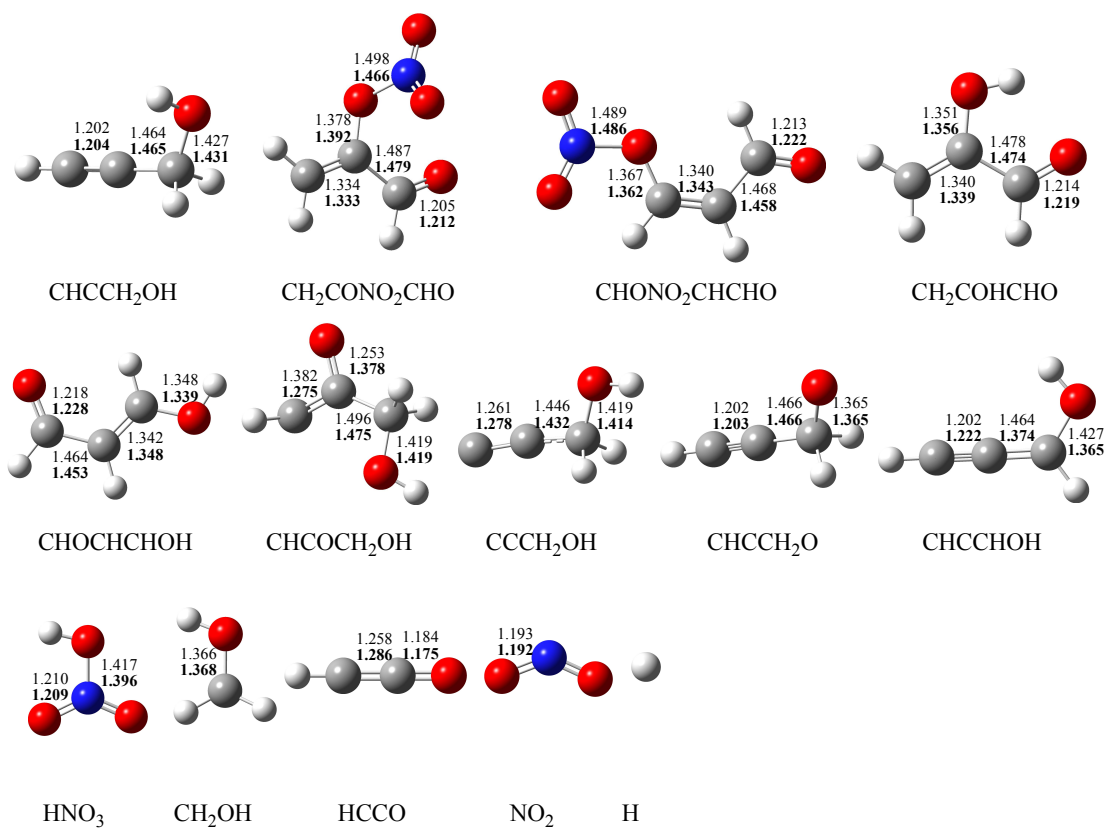

**Fig S2.** The optimized geometries for all products on the PESs involved in  $\text{NO}_3 + \text{CH}\equiv\text{CCH}_2\text{OH}$  reaction using B3LYP method. Bond distances are in Å. The first and bold values represents the gaseous phase and aqueous phase under the implicit water model (PCM), respectively.
